# Supplementary material for: Influence of ITO electrode on the electrochromic performance outcomes of viologen-functionalized polyhedral oligomeric silsesquioxanes
Source: Royal Society of Chemistry journal article supplement (doi:10.1039/d2ra02083a), 2022-01-01
Supplement: d2ra02083a1.pdf [file d2ra02083a1.pdf]

## **Supplementary Data**

Influence of ITO electrodes on the electrochromic performance outcomes of viologen-functionalized polyhedral oligomeric silsesquioxanes

Gaurav K. Pande,<sup>1</sup> Fayong Sun,<sup>1</sup> Do Yeon Kim,<sup>2</sup> Joo Hee Eom,<sup>1</sup> Jong S. Park<sup>1,2,\*</sup>

<sup>1</sup> School of Chemical Engineering, <sup>2</sup> Department of Organic Material Science and Engineering,  
Pusan National University, Busan 46241, Republic of Korea

\* Corresponding author e-mail: [jongpark@pusan.ac.kr](mailto:jongpark@pusan.ac.kr) (Prof. J. S. Park)

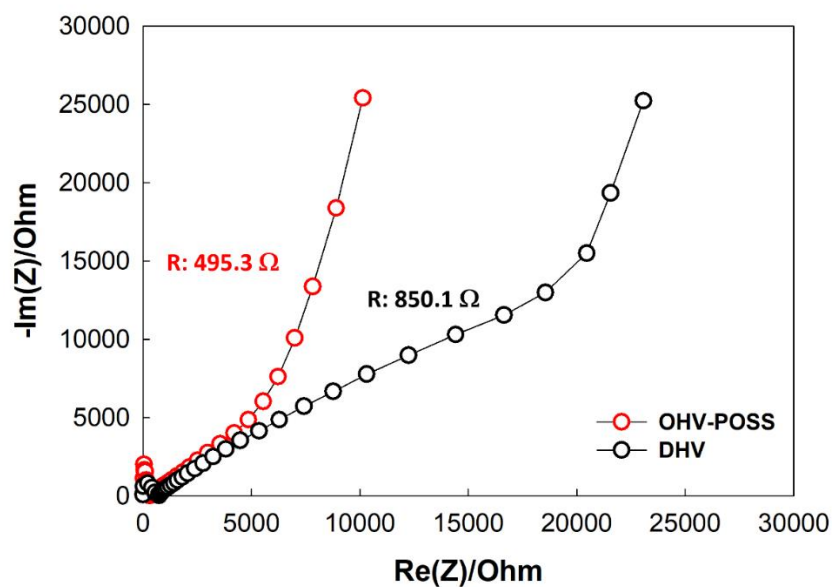

**Figure S1.** Impedance plots for measuring ionic conductivity of ion gel compositions made up of PVDF-HFP, [BMIM][BF<sub>4</sub>] containing OHV-POSS and DHV.

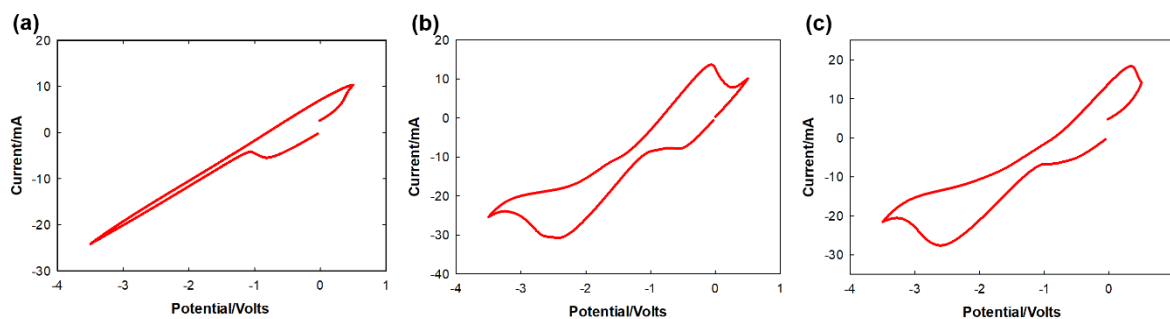

**Figure S2.** Cyclic voltammograms with scan rates 200 mV/s for [OHV-POSS][PF<sub>6</sub>]<sub>16</sub> based ECDs with ITO-thickness (a) 68.5 nm (b) 140.3 nm, and (c) 252.1 nm.

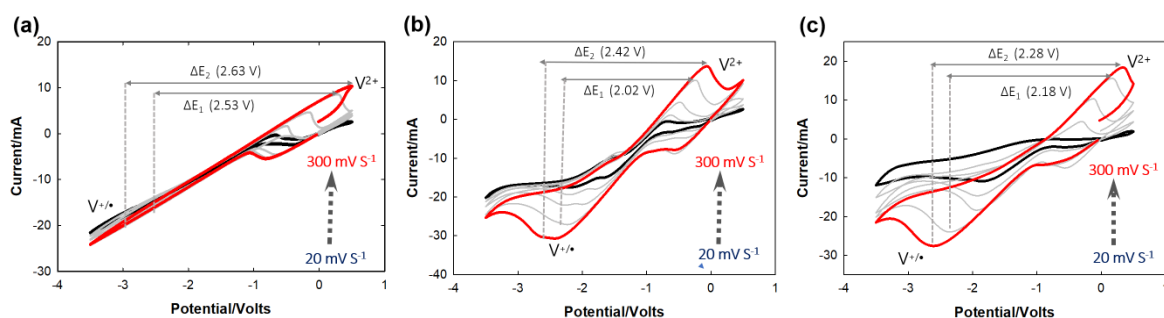

**Figure S3.** Cyclic voltammetry curves with different scan rates, 20, 50, 100, 200, and 300 mV/s for [OHV-POSS][PF<sub>6</sub>]<sub>16</sub> based ECDs with ITO-thickness (a) 68.5 nm (b) 140.3 nm, and (c) 252.1 nm.  $\Delta E$  represents the potential gap between viologen redox states i.e., dicationic and radical states ( $V^{2+}/V^{\bullet+}$ ). The thickness of the prepared ion gel film were 60  $\mu\text{m}$  in ECDs.

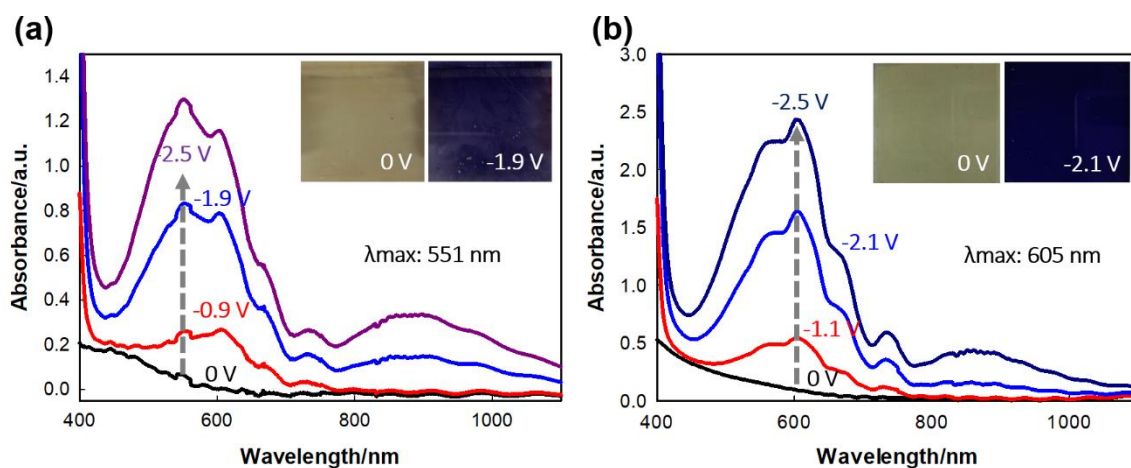

**Figure S4.** Spectroelectrochemical curves obtained with different applied potentials for (a) [OHV-POSS][PF<sub>6</sub>]<sub>16</sub>, and (b) [DHV][PF<sub>6</sub>]<sub>2</sub> in [BMIM][BF<sub>4</sub>] containing ion gel based ECDs prepared using electrode with ITO thickness of 252.1 nm.

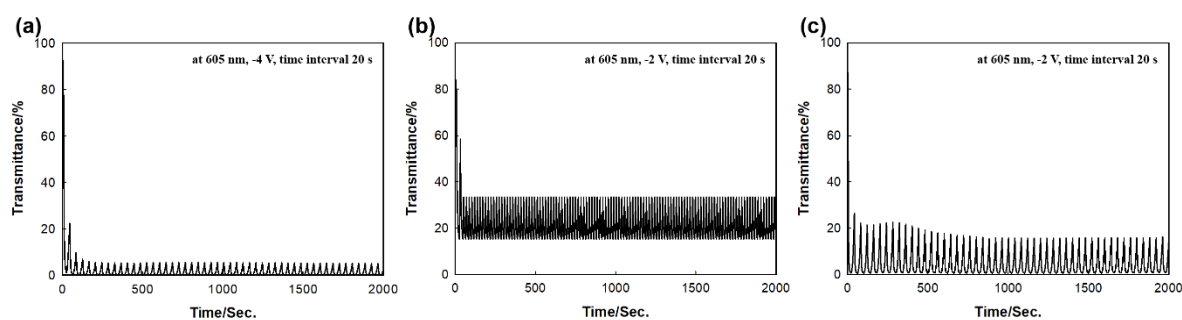

**Figure S5.** Kinetic stability of the electrochromic device (ECD) containing  $[\text{DHV}][\text{PF}_6]_2$  at  $\lambda_{\text{max}}$  605 nm prepared with ITO-thickness (a) 68.5 nm, (b) 140.3 nm and (c) 252.1 nm, during constant potential stepping between (coloration) and short-circuit (bleaching).

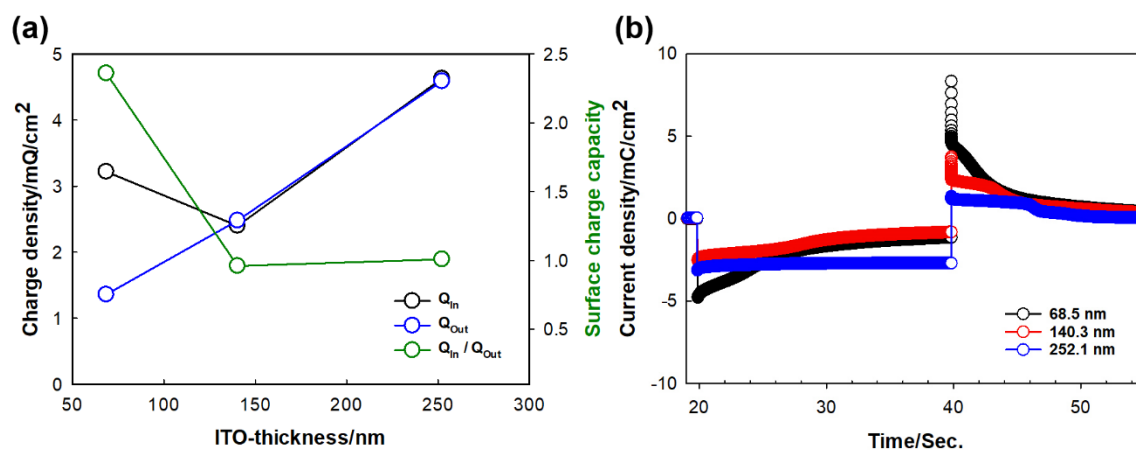

**Figure S6.** (a) ITO thickness dependant surface capacity for  $[\text{DHV}][\text{PF}_6]_2$  based ECDs as a function of  $Q_{\text{in}}$  and  $Q_{\text{out}}$ . (b) Current density response of  $[\text{DHV}][\text{PF}_6]_2$  based ECDs with ITO-thicknesses of 68.5 nm, 140.3 nm, and 252.1 nm. Corresponding current density responses for coloration and bleaching are shown in the inset.

**Table S1.** Ionic conductivity values of the prepared ion gel compositions.

| Composition                                    | Surface resistance (ohm) | Ionic conductivity (S/cm) |
|------------------------------------------------|--------------------------|---------------------------|
| PVDF-HFP / [BMIM][BF <sub>4</sub> ] / OHV-POSS | 495.3                    | 6.24 x 10 <sup>-3</sup>   |
| PVDF-HFP / [BMIM][BF <sub>4</sub> ] / DHV      | 850.1                    | 3.63 x 10 <sup>-3</sup>   |
